# Supplementary material for: Universal dynamic fitting of magnetic resonance spectroscopy
Source: PubMed Central journal article supplement (PMC7616727; doi:10.1002/mrm.30001), 2024-01-24
Supplement: EMS199450-supplement-Supporting_Information.pdf [file EMS199450-supplement-Supporting_Information.pdf]

**SUPPORTING INFORMATION**

Additional supporting information may be found in the online version of the article at the publisher's website.

**Supporting Information S1.** Supporting information.
